# Supplementary material for: In Vivo Phosphorylation of the Cytosolic Glucose-6-Phosphate Dehydrogenase Isozyme G6PD6 in Phosphate-Resupplied Arabidopsis thaliana Suspension Cells and Seedlings
Source: MDPI journal article supplement (doi:10.3390/plants13010031), 2023-12-21
Supplement: s1 [file s1]

**Table S1.** Protein accession numbers of cytosolic G6PD orthologs aligned in Figure 2.

| <b>G6PD ID</b> | <b>Species</b>                     | <b>Accession#</b> |
|----------------|------------------------------------|-------------------|
| <i>AtG6PD1</i> | <i>Arabidopsis thaliana</i>        | NP_198428         |
| <i>AtG6PD2</i> | <i>Arabidopsis thaliana</i>        | NP_196815         |
| <i>AtG6PD3</i> | <i>Arabidopsis thaliana</i>        | NP_173838         |
| <i>AtG6PD4</i> | <i>Arabidopsis thaliana</i>        | NP_563844         |
| <i>AtG6PD5</i> | <i>Arabidopsis thaliana</i>        | NP_189366         |
| <i>AtG6PD6</i> | <i>Arabidopsis thaliana</i>        | NP_198892         |
| <i>AnG6PD</i>  | <i>Aspergillus niger</i>           | P48826            |
| <i>CeG6PD</i>  | <i>Caenorhabditis elegans</i>      | Q27464            |
| <i>CvG6PD1</i> | <i>Chlorella vulgaris</i>          | BAB96757          |
| <i>GmG6PD2</i> | <i>Glycine max</i>                 | XP_040868353      |
| <i>GmG6PD4</i> | <i>Glycine max</i>                 | XP_006599060      |
| <i>HsG6PD</i>  | <i>Homo Sapiens</i>                | P11413            |
| <i>HvG6PD</i>  | <i>Hordeum vulgare</i>             | XP_044966924      |
| <i>MmG6PD</i>  | <i>Mus musculus</i>                | Q00612            |
| <i>NpG6PD</i>  | <i>Nostoc punctiforme</i>          | P48848            |
| <i>OsG6PD1</i> | <i>Oryza sativa Japonica Group</i> | XP_015627059      |
| <i>OsG6PD2</i> | <i>Oryza sativa Japonica Group</i> | XP_015635836      |
| <i>PpG6PD1</i> | <i>Physcomitrium patens</i>        | XP_024357847      |
| <i>RnG6PD</i>  | <i>Rattus norvegicus</i>           | P05370            |
| <i>SlG6PD4</i> | <i>Solanum lycopersicum</i>        | XP_004231802.1    |
| <i>StG6PD2</i> | <i>Solanum tuberosum</i>           | NP_001275397.1    |

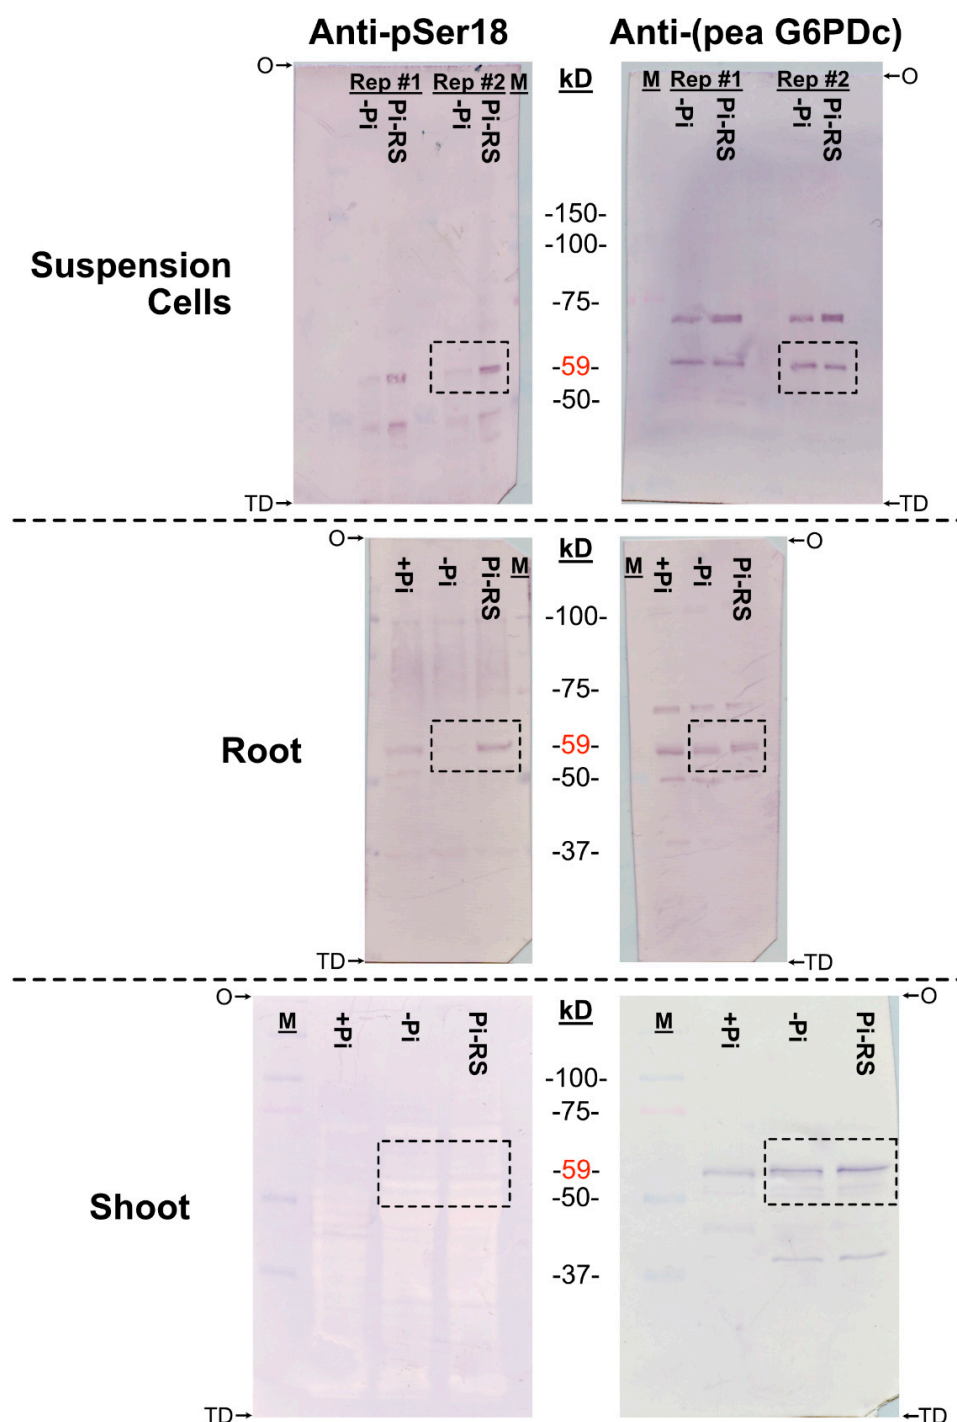

**Figure S1.** Uncropped immunoblots of Figure 6, showing impact of Pi-resupply on G6PD6's Ser18 phosphorylation status. Clarified extracts from: Pi-sufficient ('+Pi'), -Pi, and 48 h Pi-resupplied (Pi-RS) suspension cells, and -Pi or 48 h Pi-resupplied seedlings (shoots and roots) were subjected to SDS/PAGE followed by immunoblotting with anti-pSer18 (+10  $\mu$ g/mL dephospho (deP)-peptide) or anti-(pea G6PDc). Approximately 8 and 1  $\mu$ g of protein were loaded into each lane of the anti-pSer18 and anti-(pea G6PDc) immunoblots, respectively. Boxed areas represent the cropped portions shown in Figure 6. 'O' and 'TD' denote origin and tracking dye fronts, respectively, and 'M' indicates various pre-stained molecular mass standards.

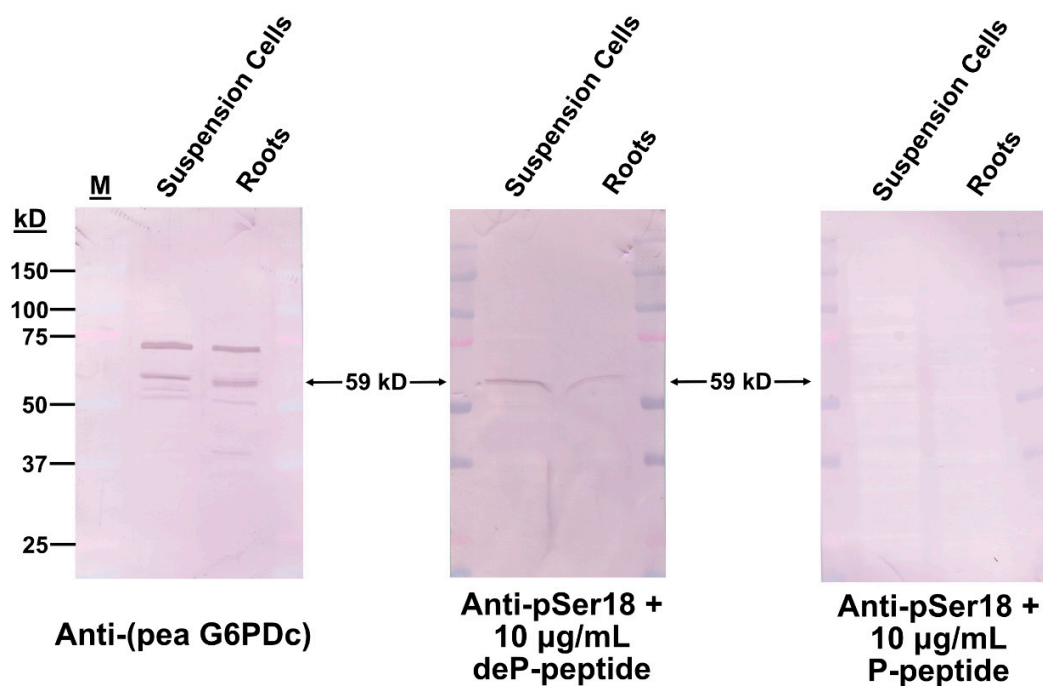

**Figure S2.** Specificity of phospho-site specific antibody raised against pSer18 of *Arabidopsis* G6PD6 (anti-pSer18). Clarified extracts from the 48 h Pi-resupplied suspension cells and seedlings (roots) were subjected to SDS/PAGE followed by immunoblotting with anti-(pea G6PDc), or anti-pSer18 in the presence of either 10 µg/mL of the dephospho- (deP-) or phospho- (P-) peptide shown in Figure 5A. Approximately 1 and 8 µg of protein were loaded into each lane of the anti-(pea G6PDc) and anti-pSer18 immunoblots, respectively.
